# Supplementary material for: Breakfast and Breakfast Cereal Choice and Its Impact on Nutrient and Sugar Intakes and Anthropometric Measures among a Nationally Representative Sample of Australian Children and Adolescents
Source: MDPI journal article supplement (doi:10.3390/nu9101045), 2017-09-21
Supplement: s1 [file s1]

**Table S1.** The weighted percentage of breakfast cereal consumers among children and adolescents, 2-18years, by type of breakfast cereal \* consumed.

|              | Breakfast Cereal Consumers |                   |    |                 |     |                    |    |                 |
|--------------|----------------------------|-------------------|----|-----------------|-----|--------------------|----|-----------------|
|              |                            | RTE               |    | Muesli          |     | Hot-Porridge Style |    | Mixed           |
|              | n                          | % (95% CI)        | n  | % (95% CI)      | n   | % (95% CI)         | n  | % (95% CI)      |
| All children | 1103                       | 86.9 (85.1, 88.8) | 18 | 1.5 (0.8, 2.1)  | 137 | 10.8 (9.1, 12.5)   | 10 | 0.8 (0.3, 1.3)  |
| Sex          |                            |                   |    |                 |     |                    |    |                 |
| Boys         | 613                        | 89.5 (87.2, 91.8) | 7  | 1.0 (0.2, 1.7)  | 58  | 8.5 (6.4, 10.6)    | 7  | 1.1 (0.3, 1.8)  |
| Girls        | 490                        | 83.9 (80.9, 86.9) | 12 | 2.0 (0.9, 3.2)  | 79  | 13.5 (10.8, 16.3)  | 3  | 0.5 (-0.1, 1.1) |
| Age group    |                            |                   |    |                 |     |                    |    |                 |
| 2-3 years    | 166                        | 86.0 (81.1, 90.9) | 0  | 0.2 (-0.4, 0.8) | 21  | 11.0 (6.6, 15.4)   | 5  | 2.8 (0.5, 5.2)  |
| 4-8 years    | 400                        | 86.9 (83.9, 90.0) | 5  | 1.1 (0.1, 2.1)  | 54  | 11.7 (8.7, 14.6)   | 1  | 0.3 (-0.2, 0.8) |
| 9-13 years   | 323                        | 87.9 (84.6, 91.3) | 2  | 0.5 (-0.2, 1.3) | 39  | 10.6 (7.4, 13.7)   | 3  | 1.0 (0.0, 1.9)  |
| 14-18 years  | 214                        | 86.1 (81.8, 90.4) | 11 | 4.4 (1.9, 7.0)  | 24  | 9.5 (5.8, 13.1)    | 0  | 0.0 (0.0, 0.0)  |

Abbreviations: CI—confidence interval; RTE—ready-to-eat. \* RTE cereal consumers were exclusive consumers at breakfast of sub-major food groups 'breakfast cereals, ready to eat', apart from 12514007–12514024 and 12515027. Muesli consumers were exclusive consumers at breakfast of any of food groups 12514007–12515024 or 12515027. Hot-porridge style cereal consumers were exclusive consumers at breakfast of the food group 'breakfast cereals, hot porridge style'. Mixed cereal consumers had more than one type of cereal at breakfast.

**Table S2.** The contribution of the breakfast cereal to total daily nutrient intakes by type of breakfast cereal in breakfast cereal consumers \*.

| Nutrient <sup>†</sup>                       | Breakfast Cereal Consumers |                         |                         |
|---------------------------------------------|----------------------------|-------------------------|-------------------------|
|                                             | RTE                        | Muesli                  | Hot-Porridge Style      |
|                                             | (n = 1103)                 | (n = 18)                | (n = 137)               |
| Contribution to Total Daily Intake (% ± SE) |                            |                         |                         |
| Energy                                      | 9.1 ± 0.3 <sup>a</sup>     | 16.0 ± 1.6 <sup>b</sup> | 17.1 ± 0.6 <sup>b</sup> |
| Protein                                     | 7.2 ± 0.3 <sup>a</sup>     | 10.1 ± 1.7 <sup>a</sup> | 18.4 ± 0.6 <sup>b</sup> |
| Total fat                                   | 2.2 ± 0.2 <sup>a</sup>     | 12.9 ± 1.1 <sup>b</sup> | 14.9 ± 0.4 <sup>b</sup> |
| <i>Saturated fat</i>                        | 1.1 ± 0.2 <sup>a</sup>     | 7.5 ± 1.2 <sup>b</sup>  | 14.1 ± 0.4 <sup>c</sup> |
| Total sugars                                | 5.8 ± 0.4 <sup>a</sup>     | 18.3 ± 2.2 <sup>b</sup> | 13.7 ± 0.8 <sup>b</sup> |
| <i>Added sugars</i>                         | 12.6 ± 0.8                 | 14.3 ± 5.2              | 5.9 ± 1.9               |
| <i>Free sugars</i>                          | 10.6 ± 0.7                 | 14.4 ± 4.3              | 4.8 ± 1.6               |
| Carbohydrate                                | 13.1 ± 0.3 <sup>a</sup>    | 23.4 ± 2.1 <sup>b</sup> | 18.3 ± 0.7 <sup>b</sup> |

|               |                         |                           |                           |
|---------------|-------------------------|---------------------------|---------------------------|
| Dietary fibre | 17.8 ± 0.6 <sup>a</sup> | 29.0 ± 3.7 <sup>a,b</sup> | 24.4 ± 1.3 <sup>b</sup>   |
| Niacin        | 17.3 ± 0.5              | 12.4 ± 3.1                | 14.5 ± 1.1                |
| Iron          | 36.9 ± 0.7 <sup>a</sup> | 30.5 ± 4.4 <sup>a,b</sup> | 21.9 ± 1.6 <sup>b</sup>   |
| Thiamin       | 39.7 ± 0.9 <sup>a</sup> | 22.4 ± 5.3 <sup>a,b</sup> | 14.9 ± 1.9 <sup>b</sup>   |
| Riboflavin    | 25.5 ± 0.7              | 11.8 ± 4.2                | 23.4 ± 1.5                |
| Folate        | 27.3 ± 0.8 <sup>a</sup> | 9.0 ± 4.8 <sup>b</sup>    | 8.2 ± 1.7 <sup>b</sup>    |
| Calcium       | 7.7 ± 0.5 <sup>a</sup>  | 6.7 ± 3.4 <sup>a</sup>    | 27.0 ± 1.2 <sup>b</sup>   |
| Sodium        | 8.0 ± 0.3               | 2.7 ± 1.9                 | 5.5 ± 0.7                 |
| Magnesium     | 13.0 ± 0.4 <sup>a</sup> | 28.4 ± 2.7 <sup>b</sup>   | 26.2 ± 1.0 <sup>a,b</sup> |
| Potassium     | 5.3 ± 0.3 <sup>a</sup>  | 12.9 ± 1.6 <sup>b</sup>   | 19.1 ± 0.6 <sup>b</sup>   |

Abbreviations: CI—confidence interval; RTE—ready-to-eat. \* RTE cereal consumers were exclusive consumers at breakfast of sub-major food groups ‘breakfast cereals, ready to eat’, apart from 12514007–12514024 and 12515027. Muesli consumers were exclusive consumers at breakfast of any of food groups 12514007–12515024 or 12515027. Hot-porridge style cereal consumers were exclusive consumers at breakfast of the food group ‘breakfast cereals, hot porridge style’. <sup>†</sup> Mean energy contribution was adjusted for sex, age group, the interaction of sex and age group, and BMI z-score category. Mean nutrient contribution was adjusted for sex, age group, the interaction of sex and age group, energy intake, and BMI z-score category. Different superscripts a, b, c denotes significant difference between groups ( $p < 0.001$ ) by post hoc, Bonferroni.

**Table S3.** Total daily energy and nutrient intake by cereal type in breakfast cereal consumers <sup>\*</sup>.

| Nutrient <sup>†</sup>             | Breakfast Cereal Consumers |                           |                        |
|-----------------------------------|----------------------------|---------------------------|------------------------|
|                                   | RTE                        | Muesli                    | Hot-Porridge Style     |
|                                   | ( <i>n</i> = 1103)         | ( <i>n</i> = 18)          | ( <i>n</i> = 137)      |
| Daily Nutrient Intake (Mean ± SE) |                            |                           |                        |
| Energy (kJ)                       | 7746 ± 92                  | 9604 ± 764                | 7942 ± 254             |
| Protein (g)                       | 76.2 ± 0.9                 | 93.8 ± 6.2                | 78.0 ± 2.2             |
| Total fat (g)                     | 67.0 ± 0.6                 | 78.5 ± 4.5                | 67.0 ± 1.6             |
| <i>Saturated fat</i> (g)          | 29.3 ± 0.4                 | 28.8 ± 2.6                | 27.5 ± 0.9             |
| Total sugars (g)                  | 120 ± 1.7                  | 94.4 ± 12                 | 118 ± 4.2              |
| <i>Added sugars</i> (g)           | 55.6 ± 1.6                 | 23.4 ± 9.8                | 49.5 ± 3.5             |
| <i>Free sugars</i> (g)            | 64.3 ± 1.6                 | 32.2 ± 10.3               | 57.7 ± 3.7             |
| Carbohydrate (g)                  | 247 ± 1.6                  | 200 ± 12                  | 244 ± 4.1              |
| Dietary fibre (g)                 | 21.4 ± 0.3                 | 28.2 ± 2.1                | 22.4 ± 0.7             |
| Niacin (mg)                       | 34.9 ± 0.5                 | 45.1 ± 3.3                | 30.5 ± 1.2             |
| Iron (mg)                         | 12.0 ± 0.1 <sup>a</sup>    | 12.2 ± 1.0 <sup>a,b</sup> | 9.3 ± 0.4 <sup>b</sup> |

|                 |                          |                           |                          |
|-----------------|--------------------------|---------------------------|--------------------------|
| Thiamin (mg)    | 2.0 ± 0.04 <sup>a</sup>  | 2.5 ± 0.3 <sup>a,b</sup>  | 1.3 ± 0.1 <sup>b</sup>   |
| Riboflavin (mg) | 2.4 ± 0.04 <sup>a</sup>  | 1.52 ± 0.3 <sup>a,b</sup> | 1.9 ± 0.1 <sup>b</sup>   |
| Folate (µg)     | 705 ± 12.3 <sup>a</sup>  | 583 ± 86 <sup>a,b</sup>   | 522 ± 31 <sup>b</sup>    |
| Calcium (mg)    | 936 ± 14                 | 645 ± 100                 | 942 ± 36                 |
| Sodium (mg)     | 2221 ± 34 <sup>a,b</sup> | 3001 ± 240 <sup>a</sup>   | 1857 ± 86 <sup>b</sup>   |
| Magnesium (mg)  | 274 ± 2.4 <sup>a</sup>   | 357 ± 17 <sup>b</sup>     | 294 ± 6.1 <sup>a,b</sup> |
| Potassium (mg)  | 2534 ± 27.8              | 2919 ± 196                | 2577 ± 70                |

Abbreviations: CI— confidence interval; RTE—ready-to-eat. \* RTE cereal consumers were exclusive consumers at breakfast of sub-major food groups 'breakfast cereals, ready to eat', apart from 12514007–12514024 and 12515027. Muesli consumers were exclusive consumers at breakfast of any of food groups 12514007–12515024 or 12515027. Hot-porridge style cereal consumers were exclusive consumers at breakfast of the food group 'breakfast cereals, hot porridge style'. Mixed cereal consumers had more than one type of cereal at breakfast. <sup>†</sup> Mean energy contribution was adjusted for sex, age group, the interaction of sex and age group, and BMI z-score category. Mean nutrient contribution was adjusted for energy intake, sex, age group, the interaction of sex and age group, and BMI z-score category. Different superscripts a, b, c denotes significant difference between groups ( $p < 0.001$ ) by post hoc, Bonferroni.
